# Supplementary material for: Small RNA and transcriptome deep sequencing proffers insight into floral gene regulation in Rosa cultivars
Source: PubMed Central journal article supplement (PMC3527192; doi:10.1186/1471-2164-13-657), 2012-11-21

# Additional File 1. Small RNA length Distribution (raw data)

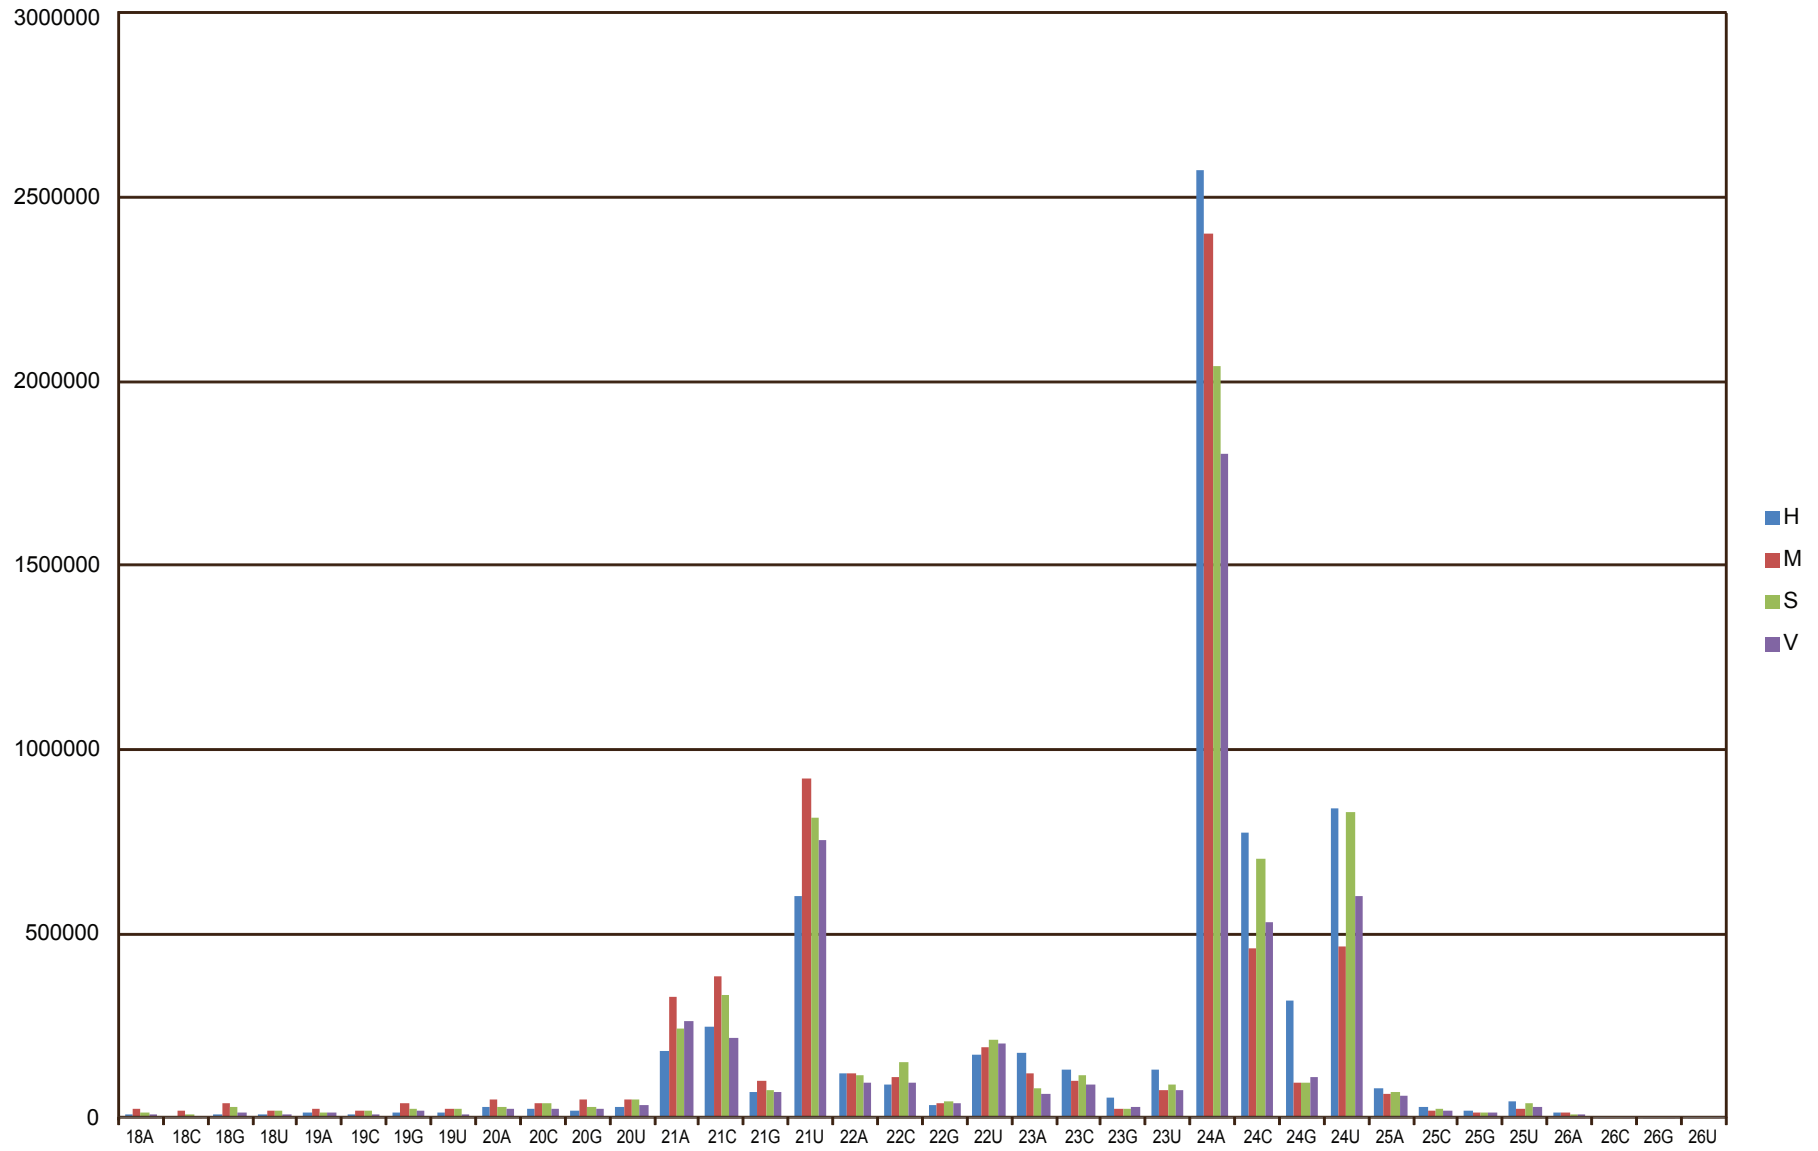

Supplement: 1471-2164-13-657-S1.pdf [file 1471-2164-13-657-S1.pdf]
